# Supplementary material for: Achieving the highest density and energy within diazo-oxide compounds
Source: Royal Society of Chemistry journal article supplement (doi:10.1039/d2qm00396a), 2022-01-01
Supplement: d2qm00396a1.pdf [file d2qm00396a1.pdf]

Supporting Information

for

## **Achieving the highest density and energy within diazo-oxide compounds**

Ning Ding<sup>+a</sup>, Qi Sun<sup>+a</sup>, Chaofeng Zhao<sup>a</sup>, Wenjin Zhang<sup>a</sup>, Shenghua Li<sup>\*,a,b</sup>, Siping Pang<sup>\*,a</sup>

<sup>a</sup>School of Materials Science & Engineering, Beijing Institute of Technology, Beijing 100081, China

<sup>b</sup>Yangtz Delta Region Academy of Beijing Institute of Technology, Jiaxing 314019

Corresponding Author E-mail: lishenghua@bit.edu.cn; pangsp@bit.edu.cn

### **Table of Contents**

1. General methods
2. Safety precautions
3. Spectrum analysis
4. Crystal structures
5. Quantum computing analysis
6. Thermal stability

## 1. General Methods

All reagents were purchased from Energy Chemical of analytical grade and were used as supplied, if not stated otherwise. The melting points and decomposition temperatures were obtained on a differential scanning calorimeter (Mettler Toledo DSC823e) at a scan rate of 5 °C min<sup>-1</sup> in closed Al containers with a nitrogen flow of 50 mL min<sup>-1</sup>.

## 2. Safety Precautions

All the new pyrazole compounds in this manuscript are powerful explosives, and should be handled with extreme care using the best safety practices.

## 3. Spectrum Analysis

### 3.1 <sup>1</sup>H and <sup>13</sup>C NMR Spectra

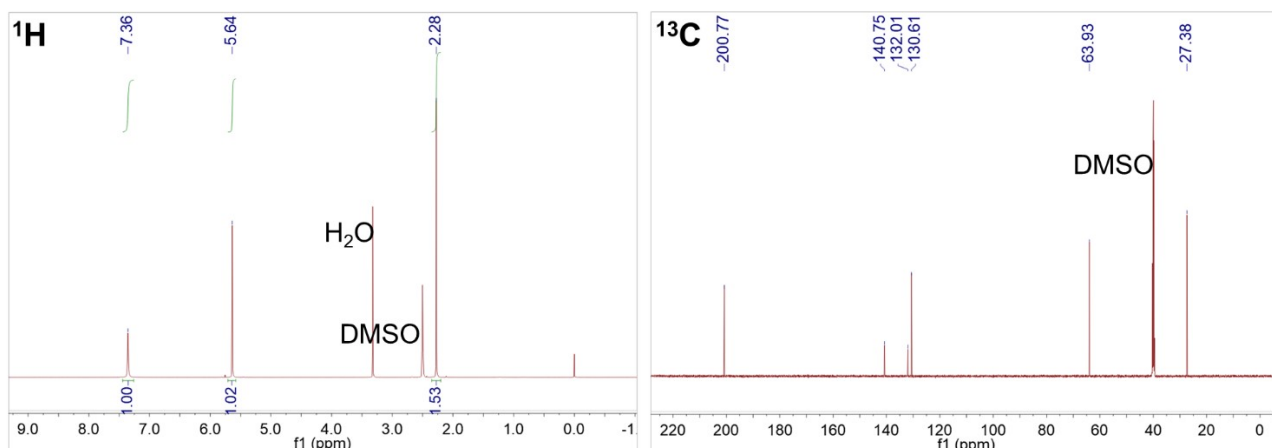

**Figure S1.** <sup>1</sup>H and <sup>13</sup>C NMR of compound **1** in DMSO-d<sub>6</sub>.

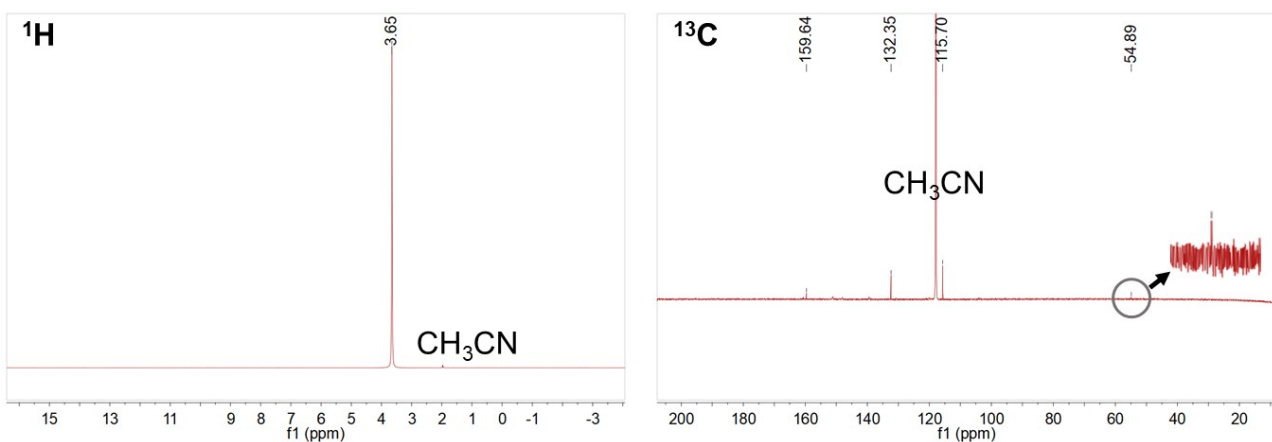

**Figure S2.** <sup>1</sup>H and <sup>13</sup>C NMR of compound **2** in CD<sub>3</sub>CN-d<sub>3</sub>.

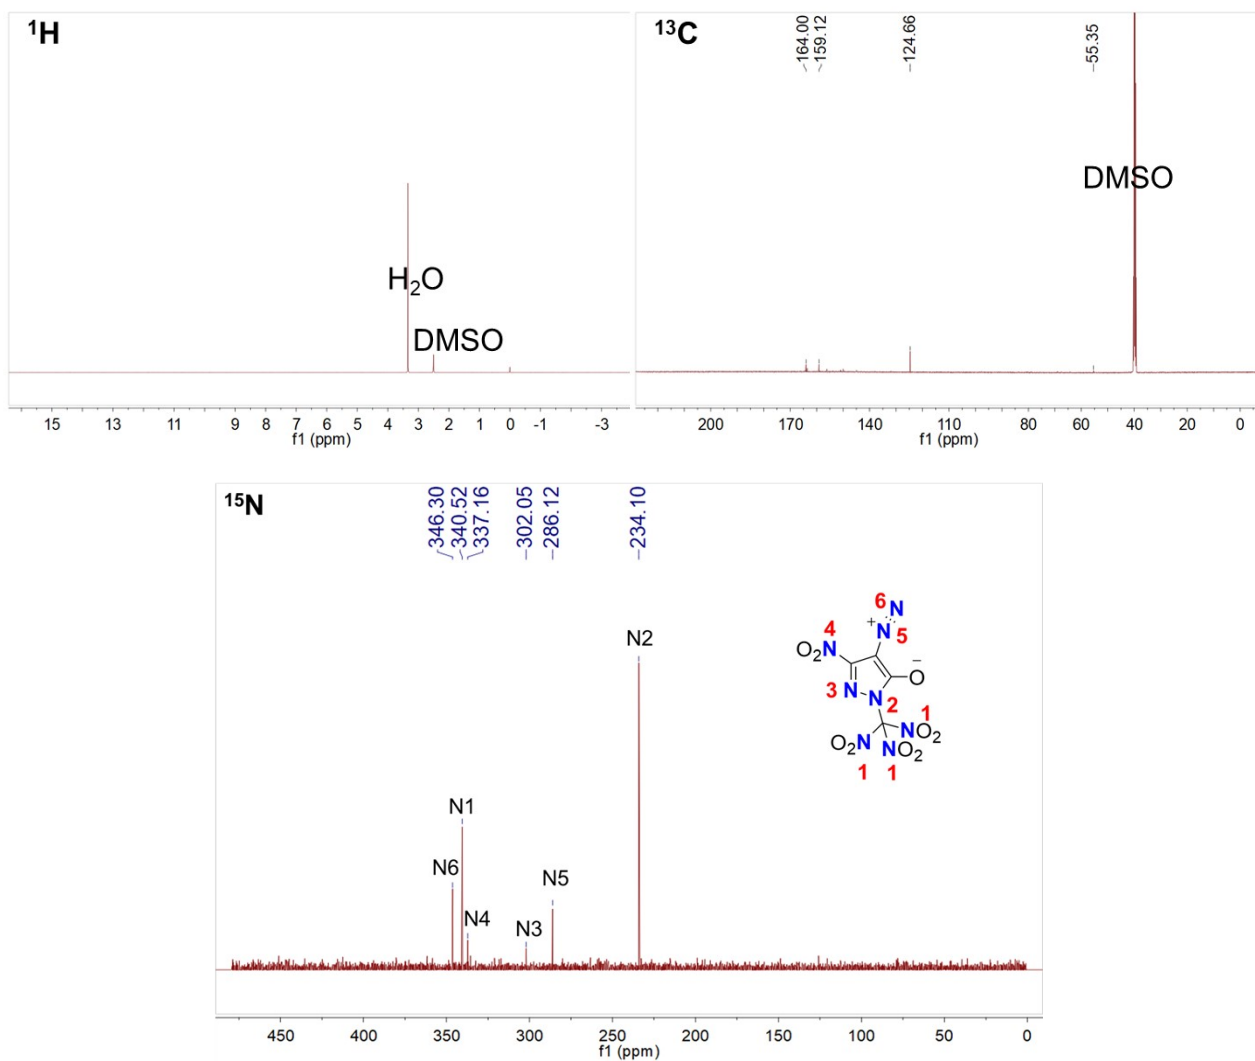

**Figure S3.**  $^1\text{H}$  and  $^{13}\text{C}$  NMR of compound **3** in  $\text{DMSO-d}_6$  and  $^{15}\text{N}$  NMR in  $\text{CH}_2\text{Cl}_2$  ( $\text{NH}_3$  as external standard).

### 3.2 IR Spectra

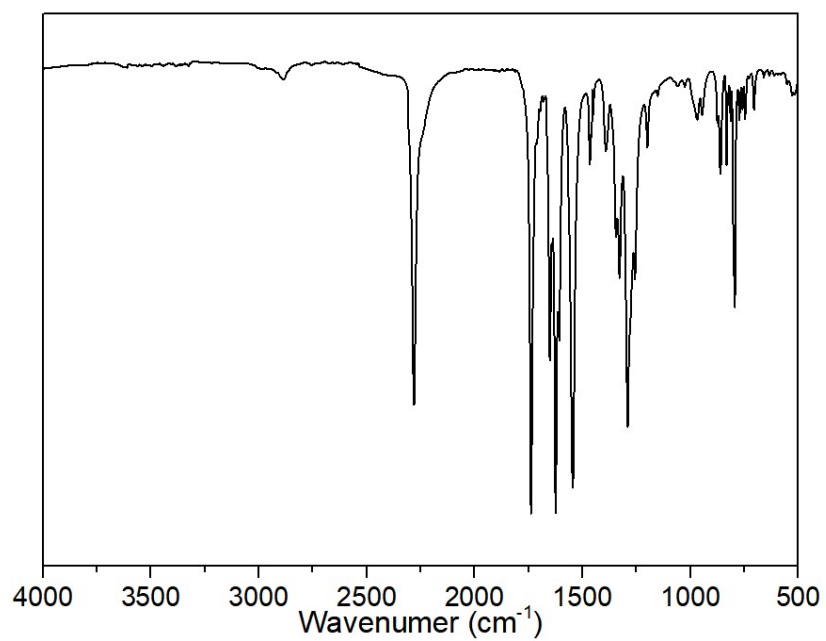

**Figure S4.** IR spectrum of **2**.

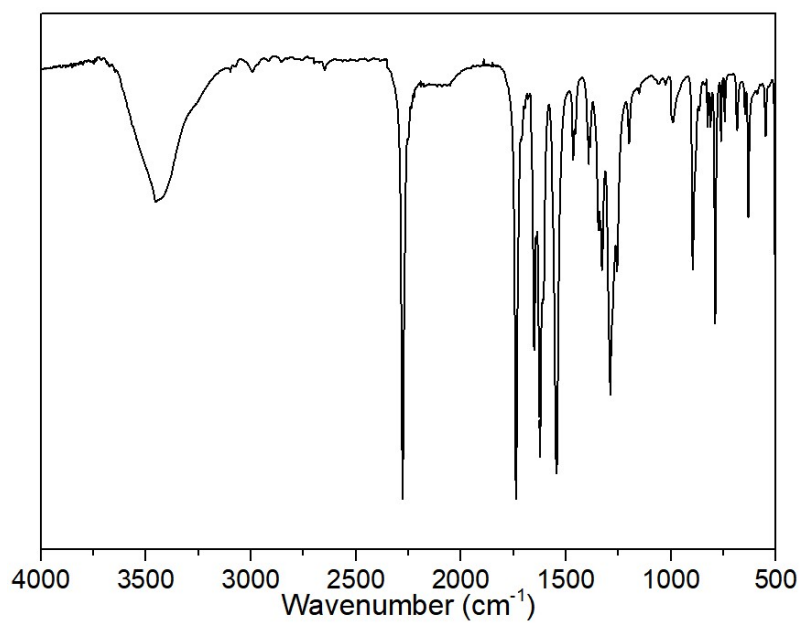

**Figure S5.** IR spectrum of **3**.

## 4. Crystal Structures

### 4.1 X-ray crystallography details

A yellow block crystal (**1**) of dimensions 0.20×0.20×0.20 mm<sup>3</sup>, a colorless block crystal (**2**) of dimensions 0.20×0.20×0.20 mm<sup>3</sup> and a colorless block crystal (**3**) of dimensions 0.20×0.20×0.20 mm<sup>3</sup> were mounted on an Enraf-Nonius CAD4 four-circle diffractometer using graphite-monochromated Mo K $\alpha$  radiation ( $\lambda = 0.71073 \text{ \AA}$ ) at 296 K. Corrections for Lorentz and polarization effects and for absorption ( $\psi$  scan) were applied. The structure was solved by direct methods using SHELXS-97 and refined by full-matrix least-squares calculation on F<sup>2</sup> with SHELXL-97. All non-hydrogen atoms were refined anisotropically. All hydrogen atoms were placed in calculated positions and were assigned fixed isotropic thermal parameters at 1.2 times the equivalent isotropic U of the atoms to which they were attached and allowed to ride on their respective parent atoms. The contributions of these hydrogen atoms were included in the structure-factor calculations.

**Table S1.** Crystallographic data for **1**, **2**, and **3**.

| Compound                                 | <b>1</b>                                                    | <b>2</b>                                      | <b>3</b>                                     |
|------------------------------------------|-------------------------------------------------------------|-----------------------------------------------|----------------------------------------------|
| Formula                                  | C <sub>6</sub> H <sub>7</sub> N <sub>5</sub> O <sub>5</sub> | C <sub>4</sub> HN <sub>7</sub> O <sub>7</sub> | C <sub>4</sub> N <sub>8</sub> O <sub>9</sub> |
| M <sub>w</sub>                           | 229.17                                                      | 259.12                                        | 304.12                                       |
| Crystal system                           | Monoclinic                                                  | Monoclinic                                    | Monoclinic                                   |
| Space group                              | P2 <sub>1</sub> /c                                          | P2 <sub>1</sub> /c                            | P2 <sub>1</sub> /c                           |
| a [Å]                                    | 4.554(2)                                                    | 5.5251(5)                                     | 10.250(3)                                    |
| b [Å]                                    | 21.006(11)                                                  | 13.8205(13)                                   | 10.283(3)                                    |
| c [Å]                                    | 9.757(5)                                                    | 12.4504(11)                                   | 11.223(3)                                    |
| α[°]                                     | 90                                                          | 90                                            | 90                                           |
| β[°]                                     | 96.452(9)                                                   | 93.952(2)                                     | 117.014(5)                                   |
| γ[°]                                     | 90                                                          | 90                                            | 90                                           |
| V [Å <sup>3</sup> ]                      | 927.5(8)                                                    | 948.45(15)                                    | 1053.9(5)                                    |
| Z                                        | 4                                                           | 4                                             | 4                                            |
| T [K]                                    | 296                                                         | 296                                           | 296                                          |
| λ [Å]                                    | 0.71073                                                     | 0.71073                                       | 0.71073                                      |
| P <sub>calcd</sub> [g cm <sup>-3</sup> ] | 1.641                                                       | 1.815                                         | 1.917                                        |
| μ [mm <sup>-1</sup> ]                    | 0.144                                                       | 0.173                                         | 0.188                                        |
| F(000)                                   | 472                                                         | 520                                           | 608                                          |
| θ range[°]                               | 2.86-25.00                                                  | 2.95-24.98                                    | 2.84-20.85                                   |
| Index ranges                             | -5 ≤ h ≤ 5                                                  | -6 ≤ h ≤ 6                                    | -12 ≤ h ≤ 12                                 |
|                                          | -24 ≤ k ≤ 24                                                | -16 ≤ k ≤ 16                                  | -12 ≤ k ≤ 12                                 |
|                                          | -11 ≤ l ≤ 10                                                | -14 ≤ l ≤ 13                                  | -13 ≤ l ≤ 13                                 |
| Data/restraints/parameters               | 1619/0/146                                                  | 1667/0/163                                    | 1842/0/190                                   |
| GOF on F <sup>2</sup>                    | 1.090                                                       | 1.037                                         | 1.032                                        |
| R[F <sup>2</sup> > 2σ(F <sup>2</sup> )]  | 0.1068                                                      | 0.0518                                        | 0.0451                                       |
| wR(F <sup>2</sup> )                      | 0.1983                                                      | 0.1324                                        | 0.1212                                       |

## 4.2 Bond lengths and angles

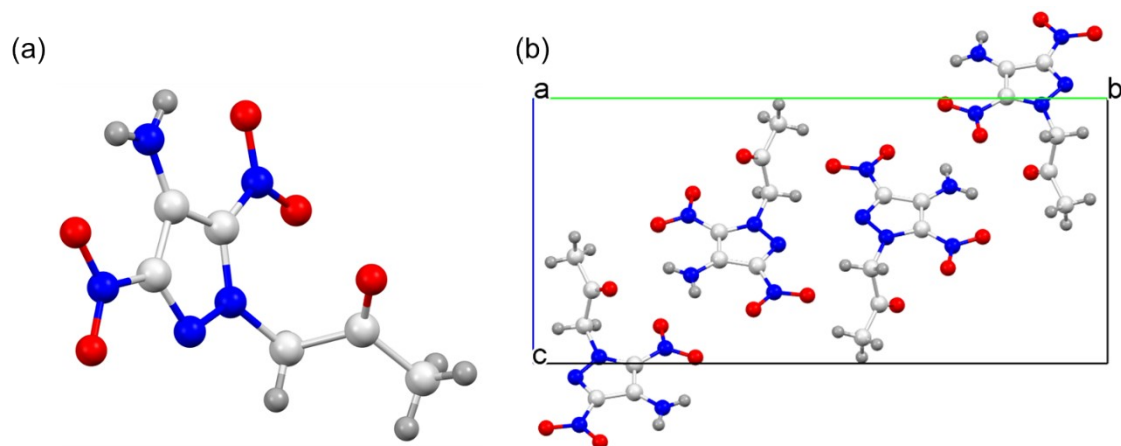

**Figure S1.** (a) Crystal structure of **1**; (b) Packing diagram of **1**.

**Table S2.** Bond lengths (Å) and bond angles (°) for **2**.

| Bond lengths      |                   |                   |
|-------------------|-------------------|-------------------|
| C6 H6A 0.9600     | C1 N2 1.336(7)    | C4 C5 1.512(8)    |
| C6 H6B 0.9600     | C1 C2 1.410(8)    | C4 H4A 0.9700     |
| C6 H6C 0.9600     | C1 N1 1.436(8)    | C4 H4B 0.9700     |
| N1 O2 1.223(6)    | C2 N4 1.344(7)    | C5 O3 1.199(7)    |
| N1 O1 1.236(6)    | C2 C3 1.382(8)    | C5 C6 1.504(8)    |
| N2 N3 1.325(6)    | C3 N3 1.370(7)    | N5 O5 1.235(6)    |
| N4 H4C 0.8600     | C3 N5 1.408(7)    | N5 O4 1.238(6)    |
| N4 H4D 0.8600     | C4 N3 1.472(7)    |                   |
| Bond angles       |                   |                   |
| N2 C1 C2 114.0(5) | N3 C4 C5 111.0(5) | C5 C6 H6A 109.5   |
| N2 C1 N1 119.4(5) | N3 C4 H4A 109.4   | C5 C6 H6B 109.5   |
| C2 C1 N1 126.6(6) | C5 C4 H4A 109.4   | H6A C6 H6B 109.5  |
| N4 C2 C3 129.2(6) | N3 C4 H4B 109.4   | C5 C6 H6C 109.5   |
| N4 C2 C1 129.6(6) | C5 C4 H4B 109.4   | H6A C6 H6C 109.5  |
| C3 C2 C1 101.2(5) | H4A C4 H4B 108.0  | H6B C6 H6C 109.5  |
| N3 C3 C2 109.1(5) | O3 C5 C6 123.5(6) | O2 N1 O1 124.7(6) |
| N3 C3 N5 123.7(5) | O3 C5 C4 121.6(6) | O2 N1 C1 118.9(6) |
| C2 C3 N5 127.2(6) | C6 C5 C4 114.9(6) | O1 N1 C1 116.4(6) |

|                   |                   |                  |
|-------------------|-------------------|------------------|
| N3 N2 C1 104.5(4) | O5 N5 O4 123.9(5) | C2 N4 H4C 120.0  |
| N2 N3 C3 111.2(5) | O5 N5 C3 116.9(5) | C2 N4 H4D 120.0  |
| N2 N3 C4 117.2(5) | O4 N5 C3 119.3(5) | H4C N4 H4D 120.0 |
| C3 N3 C4 130.1(5) |                   |                  |

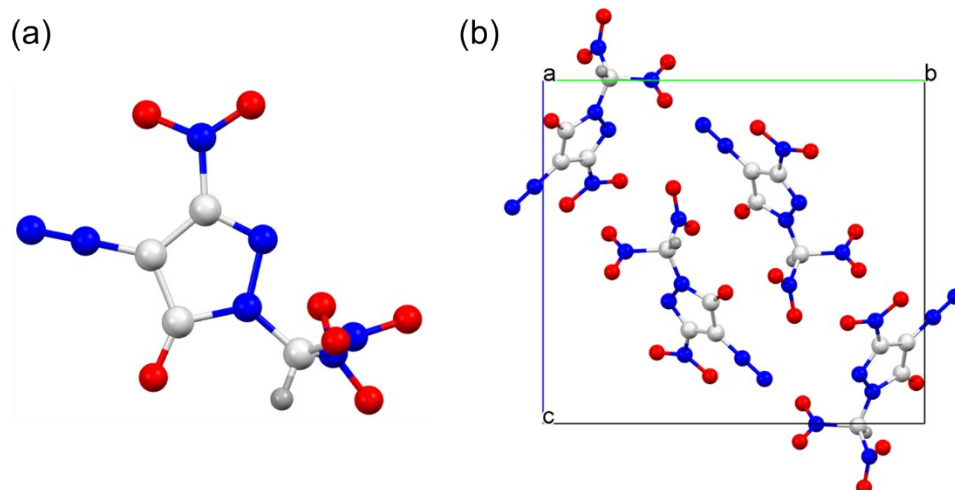

**Figure S2.** (a) Crystal structure of **2**; (b) Packing diagram of **2**.

**Table S3.** Bond lengths (Å) and bond angles (°) for **2**.

| Bond lengths      |                   |                   |
|-------------------|-------------------|-------------------|
| N1 O1 1.203(4)    | C1 N2 1.285(4)    | C3 N3 1.394(3)    |
| N1 O2 1.221(3)    | C1 C4 1.402(4)    | C3 N4 1.516(4)    |
| N2 N3 1.387(3)    | C1 N1 1.444(4)    | C3 N5 1.518(4)    |
| N4 O4 1.195(3)    | C2 O3 1.205(3)    | C3 H3 0.9800      |
| N4 O5 1.194(3)    | C2 N3 1.406(4)    | C4 N6 1.333(4)    |
| N5 O7 1.198(3)    | C2 C4 1.438(4)    | N6 N7 1.106(4)    |
| N5 O6 1.206(3)    |                   |                   |
| Bond angles       |                   |                   |
| N2 C1 C4 113.4(2) | C3 N3 C2 126.1(2) | N5 C3 H3 109.3    |
| N2 C1 N1 119.9(3) | O4 N4 O5 126.0(3) | O1 N1 O2 125.7(3) |
| C4 C1 N1 126.7(3) | O4 N4 C3 114.7(3) | O1 N1 C1 119.1(3) |
| O3 C2 N3 126.0(3) | O5 N4 C3 119.3(3) | O2 N1 C1 115.2(3) |



|                   |                   |                   |
|-------------------|-------------------|-------------------|
| O3 C2 C4 134.2(3) | O7 N5 O6 126.1(3) | C1 N2 N3 103.9(2) |
| N3 C2 C4 99.8(2)  | O7 N5 C3 116.1(3) | N2 N3 C3 118.6(2) |
| N3 C3 N4 109.0(2) | O6 N5 C3 117.8(3) | N2 N3 C2 115.1(2) |
| N3 C3 N5 113.2(2) | N6 C4 C1 128.3(3) | N7 N6 C4 179.2(4) |
| N4 C3 N5 106.8(2) | N6 C4 C2 124.0(3) | N4 C3 H3 109.3    |
| N3 C3 H3 109.3    | C1 C4 C2 107.7(2) |                   |

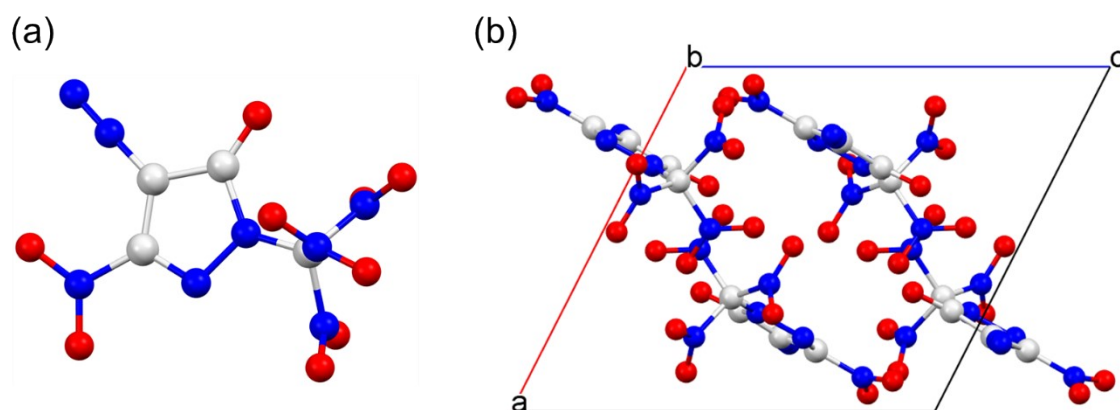

**Figure S3.** (a) Crystal structure of **3**; (b) Packing diagram of **3**.

**Table S4.** Bond lengths (Å) and bond angles (°) for **3**.

|                   |                   |                   |
|-------------------|-------------------|-------------------|
| Bond lengths      |                   |                   |
| C1 O7 1.203(3)    | N3 O5 1.184(3)    | C3 N5 1.289(3)    |
| C1 N4 1.416(3)    | N3 O6 1.188(3)    | C3 C4 1.398(4)    |
| C1 C4 1.434(4)    | N4 N5 1.390(3)    | C3 N9 1.446(3)    |
| C2 N4 1.380(3)    | C4 N7 1.335(4)    | N2 O2 1.189(3)    |
| C2 N1 1.537(3)    | N7 N8 1.101(3)    | N2 O1 1.199(3)    |
| C2 N3 1.554(3)    | N9 O9 1.206(3)    | N1 O4 1.193(3)    |
| C2 N2 1.556(3)    | N9 O8 1.219(3)    | N1 O3 1.199(3)    |
| Bond angles       |                   |                   |
| O7 C1 N4 125.4(2) | N5 N4 C1 114.5(2) | N5 C3 N9 120.6(3) |
| O7 C1 C4 134.4(2) | C3 N5 N4 103.8(2) | C4 C3 N9 125.7(3) |
| N4 C1 C4 100.2(2) | N7 C4 C3 127.3(2) | O2 N2 O1 128.0(3) |

|                   |                   |                   |
|-------------------|-------------------|-------------------|
| N4 C2 N1 114.4(2) | N7 C4 C1 124.6(2) | O2 N2 C2 116.8(2) |
| N4 C2 N3 109.2(2) | C3 C4 C1 107.7(2) | O1 N2 C2 115.2(2) |
| N1 C2 N3 108.1(2) | N8 N7 C4 179.1(3) | O4 N1 O3 127.6(3) |
| N4 C2 N2 110.1(2) | O9 N9 O8 126.4(3) | O4 N1 C2 117.6(3) |
| N1 C2 N2 106.6(2) | O9 N9 C3 118.7(3) | O3 N1 C2 114.8(3) |
| N3 C2 N2 108.2(2) | O8 N9 C3 115.0(3) | O5 N3 O6 128.2(3) |
| N5 C3 C4 113.7(2) | C2 N4 N5 118.5(2) | O5 N3 C2 115.8(3) |
| O6 N3 C2 115.9(2) | C2 N4 C1 126.5(2) |                   |

## 5. Heat of formation

The gas phase enthalpies of formation were calculated based on isodesmic reactions (Scheme S2). The enthalpy of reaction is obtained by combining the MP2/6-311++G\*\* energy difference for the reactions, the scaled zero point energies (ZPE), values of thermal correction ( $H_{\text{corr}}$ ), and other thermal factors. The heats of formation for the diazo-oxide pyrazole were obtained by an atomization approach using G2 ab initio method. The heats of formation of other compounds in Scheme S2 were obtained from the NIST WebBook. The solid state heats of formation were calculated with Trouton's rule according to the following equation (T represents either the melting point or the decomposition temperature when no melting occurs prior to decomposition).

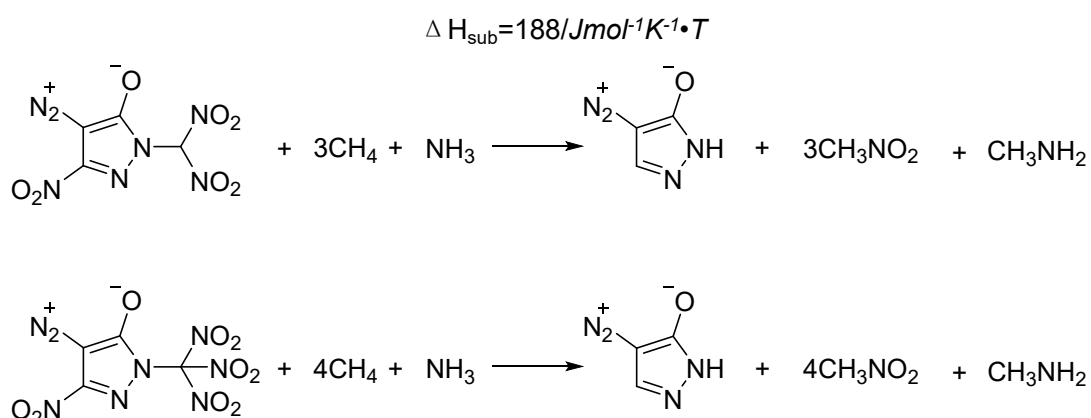

**Scheme S1.** Isodesmic reactions for calculating heats of formation for **2** and **3**, respectively.

**Table S5.** Calculated Total Energy ( $E_0$ ), Zero Point Energy (ZPE) and values of Thermal Correction ( $H_{\text{corr}}$ ) of the compounds.

| Compound                        | ZPE/a.u. | $H_{\text{corr}}$ /a.u. | $E_0$ /a.u.  |
|---------------------------------|----------|-------------------------|--------------|
| <b>2</b>                        | 0.097201 | 0.108071                | -1060.195476 |
| <b>3</b>                        | 0.098487 | 0.111628                | -1264.257444 |
| CH <sub>4</sub>                 | 0.044793 | 0.048605                | -40.3796224  |
| NH <sub>3</sub>                 | 0.034372 | 0.03819                 | -56.4154644  |
| diazo-oxide pyrazole            | 0.064026 | 0.068877                | -408.7261129 |
| CH <sub>3</sub> NH <sub>2</sub> | 0.064026 | 0.068401                | -95.5938452  |
| CH <sub>3</sub> NO <sub>2</sub> | 0.049856 | 0.055129                | -244.4784875 |

## 6. Thermal stability

Differential scanning calorimetry (DSC/TG) showed that **3** possessed a higher thermal stability with a decomposition temperature of 130 °C, while the decomposition temperature of **2** was 116 °C.

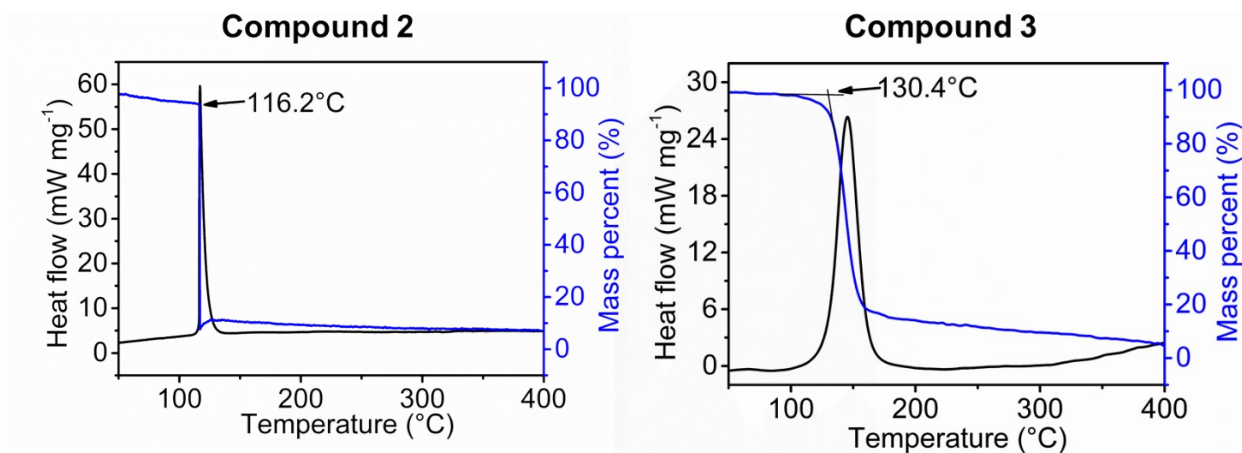

**Figure S4.** Differential scanning calorimetry and thermal gravimetric analyzer (TG-DSC) plots: (left) **2** and (right) **3**.
